# Supplementary material for: Desertomycin G, a New Antibiotic with Activity against Mycobacterium tuberculosis and Human Breast Tumor Cell Lines Produced by Streptomyces althioticus MSM3, Isolated from the Cantabrian Sea Intertidal Macroalgae Ulva sp
Source: MDPI journal article supplement (doi:10.3390/md17020114), 2019-02-12
Supplement: s1 [file s1]

# **Desertomycin G, a new antibiotic with activity against *Mycobacterium tuberculosis* and human breast tumor cell lines produced by *Streptomyces althioticus* MSM3, isolated from the Cantabrian Sea intertidal macroalgae *Ulva* sp.**

Alfredo F. Braña<sup>1</sup>, Aida Sarmiento-Vizcaíno<sup>1</sup>, Ignacio Pérez-Victoria<sup>2</sup>, Jesús Martín<sup>2</sup>, Luis Otero<sup>3</sup>, Juan José Palacios<sup>4</sup>, Jonathan Fernández<sup>4</sup>, Yamina Mohamedi<sup>5</sup>, Tania Fontanil<sup>5</sup>, Marina Salmón<sup>1</sup>, Santiago Cal<sup>5</sup>, Fernando Reyes<sup>2\*</sup>, Luis A. García<sup>6</sup> and Gloria Blanco<sup>1\*</sup>

## **List of supplementary materials**

**Figure S1.** HPLC-UV trace and UV Spectrum of compound 1.

**Figure S2.** ESI-TOF Spectrum of compound 1.

**Figure S3.** <sup>1</sup>H NMR spectrum (CD<sub>3</sub>OD, 500 MHz) of compound 1.

**Figure S4.** <sup>13</sup>C NMR spectrum (CD<sub>3</sub>OD, 125 MHz) of compound 1.

**Figure S5.** COSY spectrum of compound 1.

**Figure S6.** COSY spectrum of compound 1 (Expansion).

**Figure S7.** HSQC spectrum of compound 1.

**Figure S8.** HMBC spectrum of compound 1.

**Figure S9.** NOESY spectrum of compound 1.

**Figure S10.** NOESY spectrum of compound 1 (Expansion).

**Video 1.** Time-lapsed recording of MCF-7 cells (control).

**Video 2:** Time-lapsed recording of MCF-7 cells treated with 50 mM desertomycin G

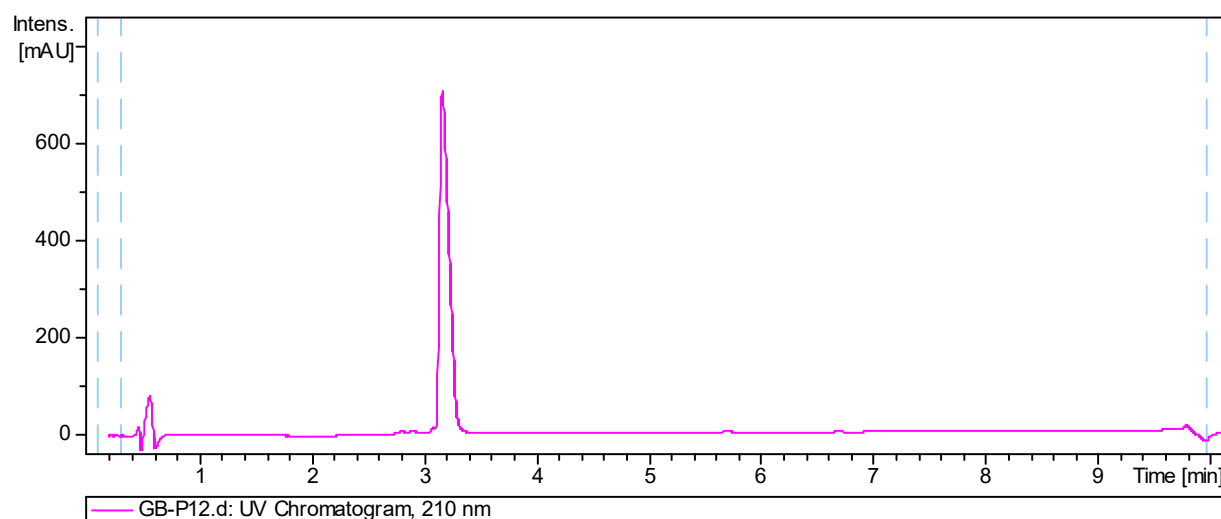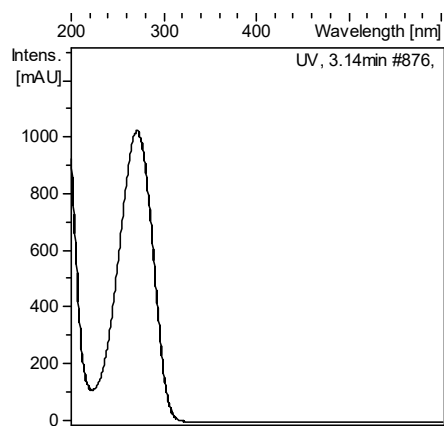

$\lambda_{\text{max}}=271\text{nm}$

**Figure S1.** HPLC trace and UV spectrum of compound **1**.

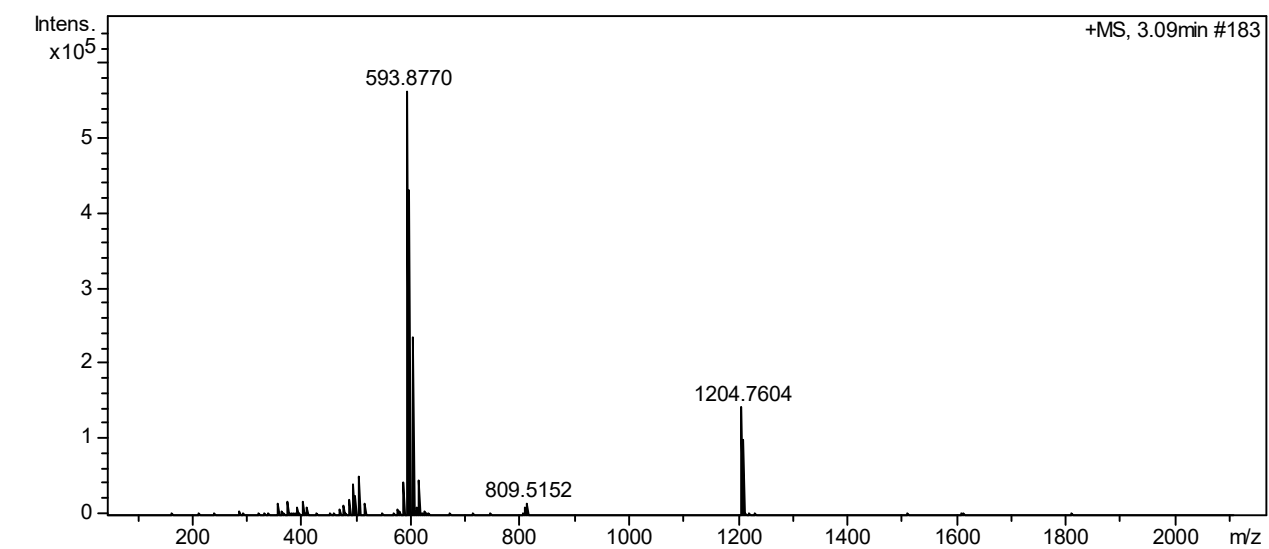

$M+H^+$ :  $C_{62}H_{110}NO_{21}^+$ : 1204.7565

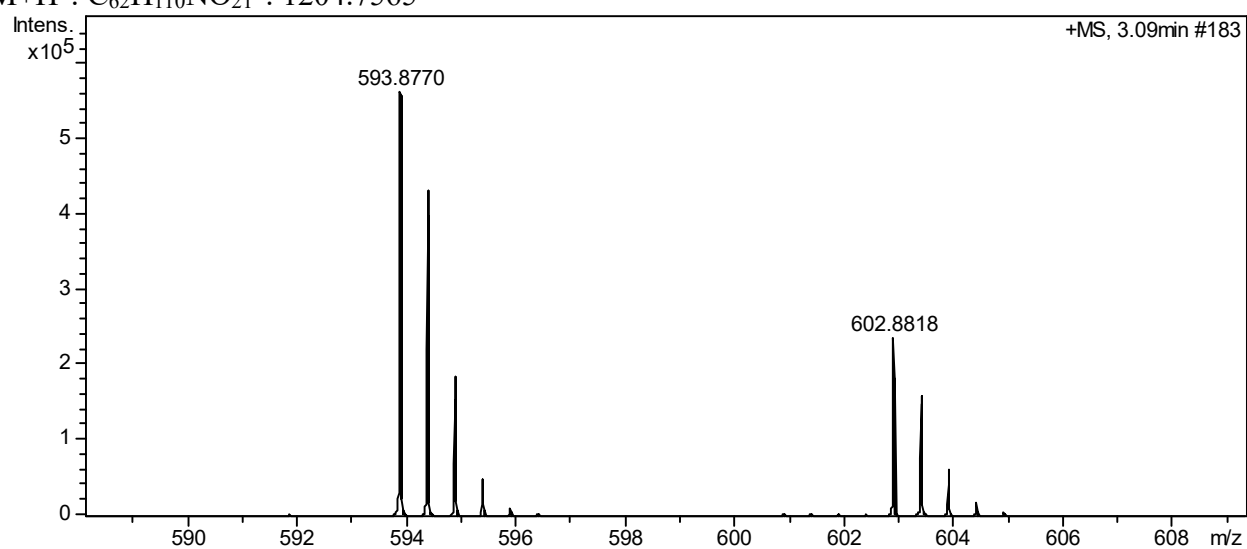

$M+2H^+$ :  $C_{62}H_{111}NO_{21}^{2+}$ : 602.8819

$M-H_2O+2H^+$ :  $C_{62}H_{109}NO_{20}^{2+}$ : 593.8766

**Figure S2.** ESI-TOF spectrum of compound 1.

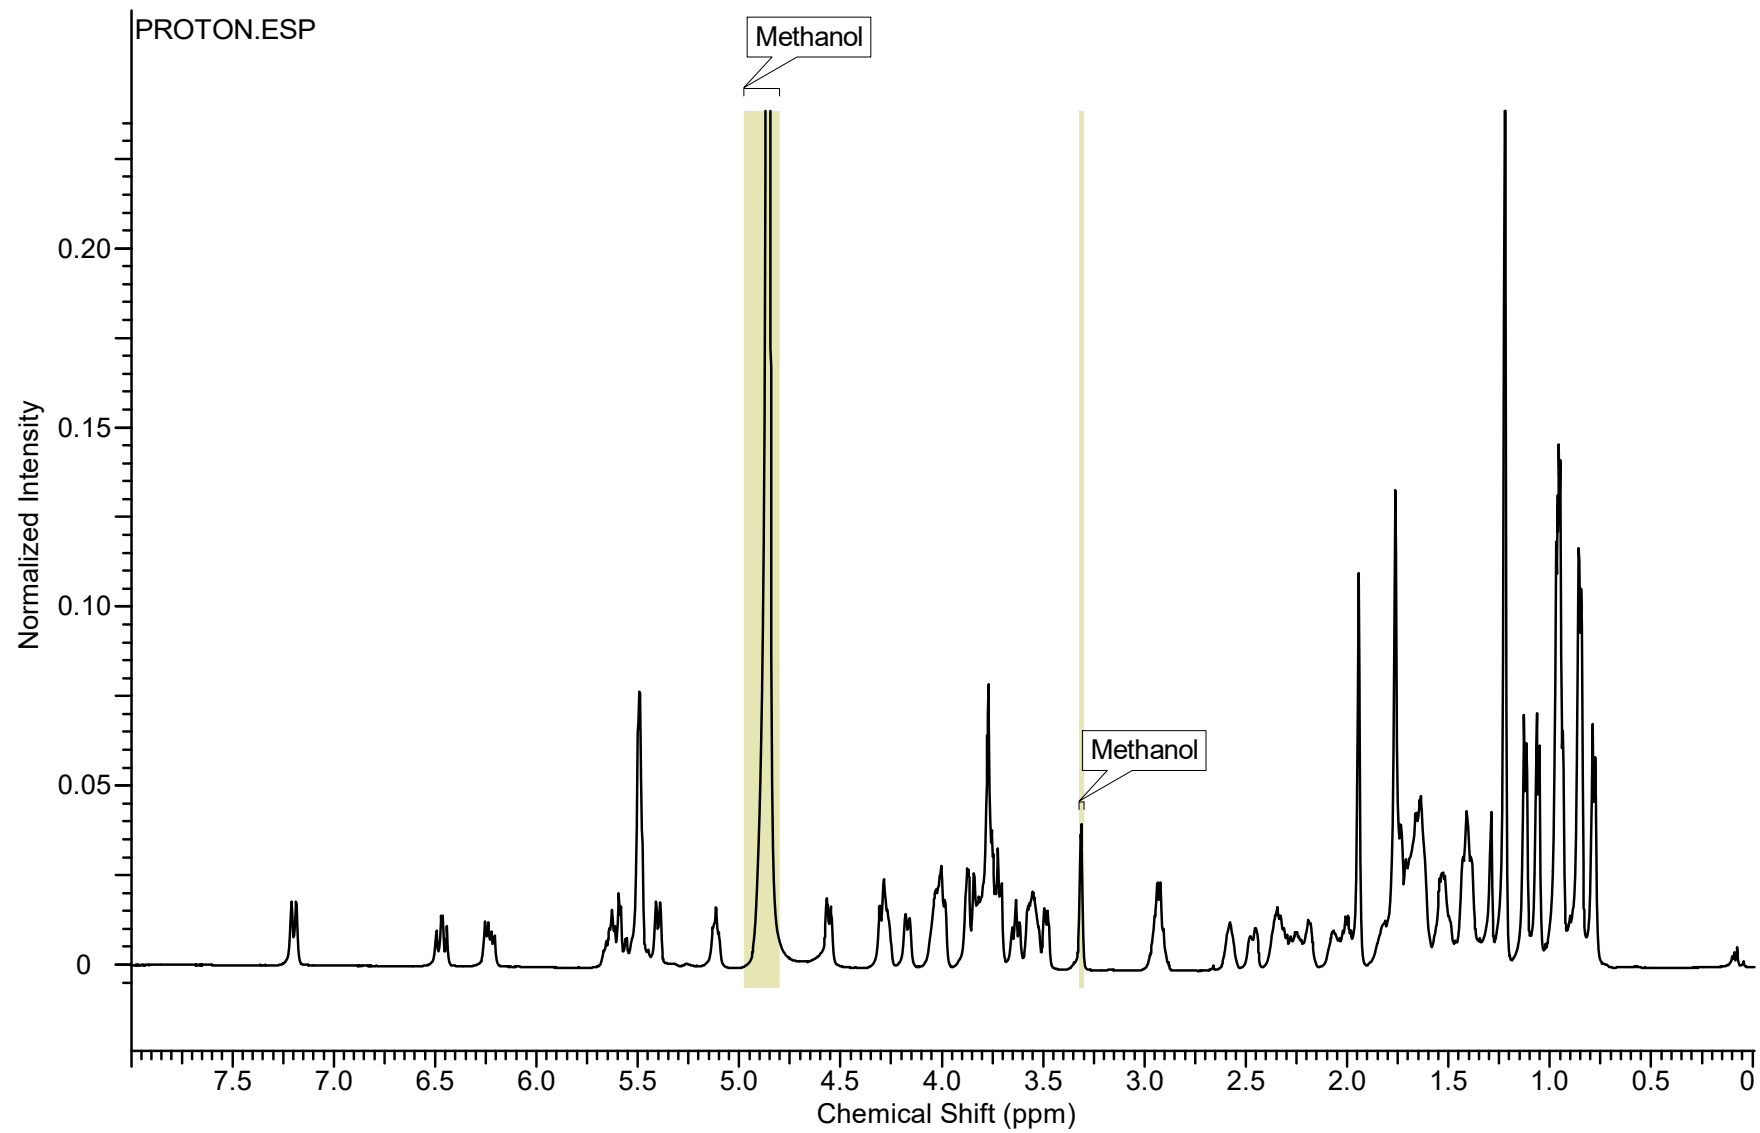

**Figure S3.**  $^1\text{H}$  NMR ( $\text{CD}_3\text{OD}$ , 500 MHz) of compound 1.

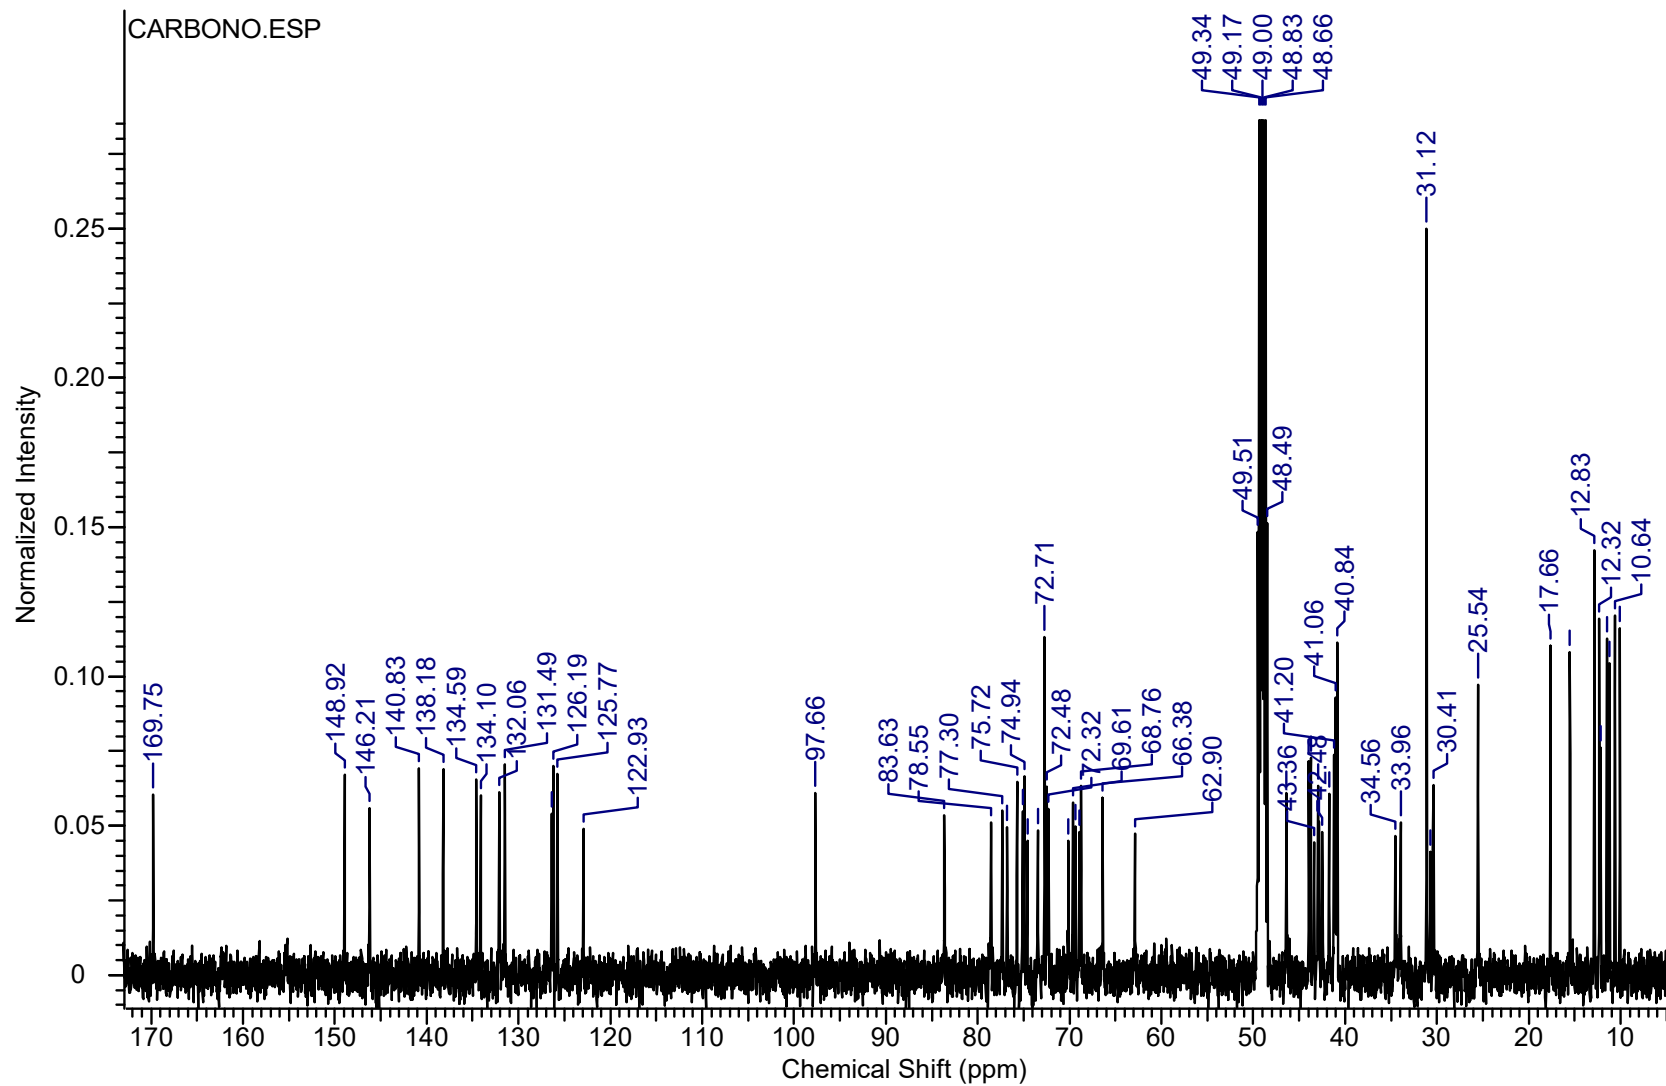

**Figure S4.**  $^{13}\text{C}$  NMR ( $\text{CD}_3\text{OD}$ , 125 MHz) of compound **1**.

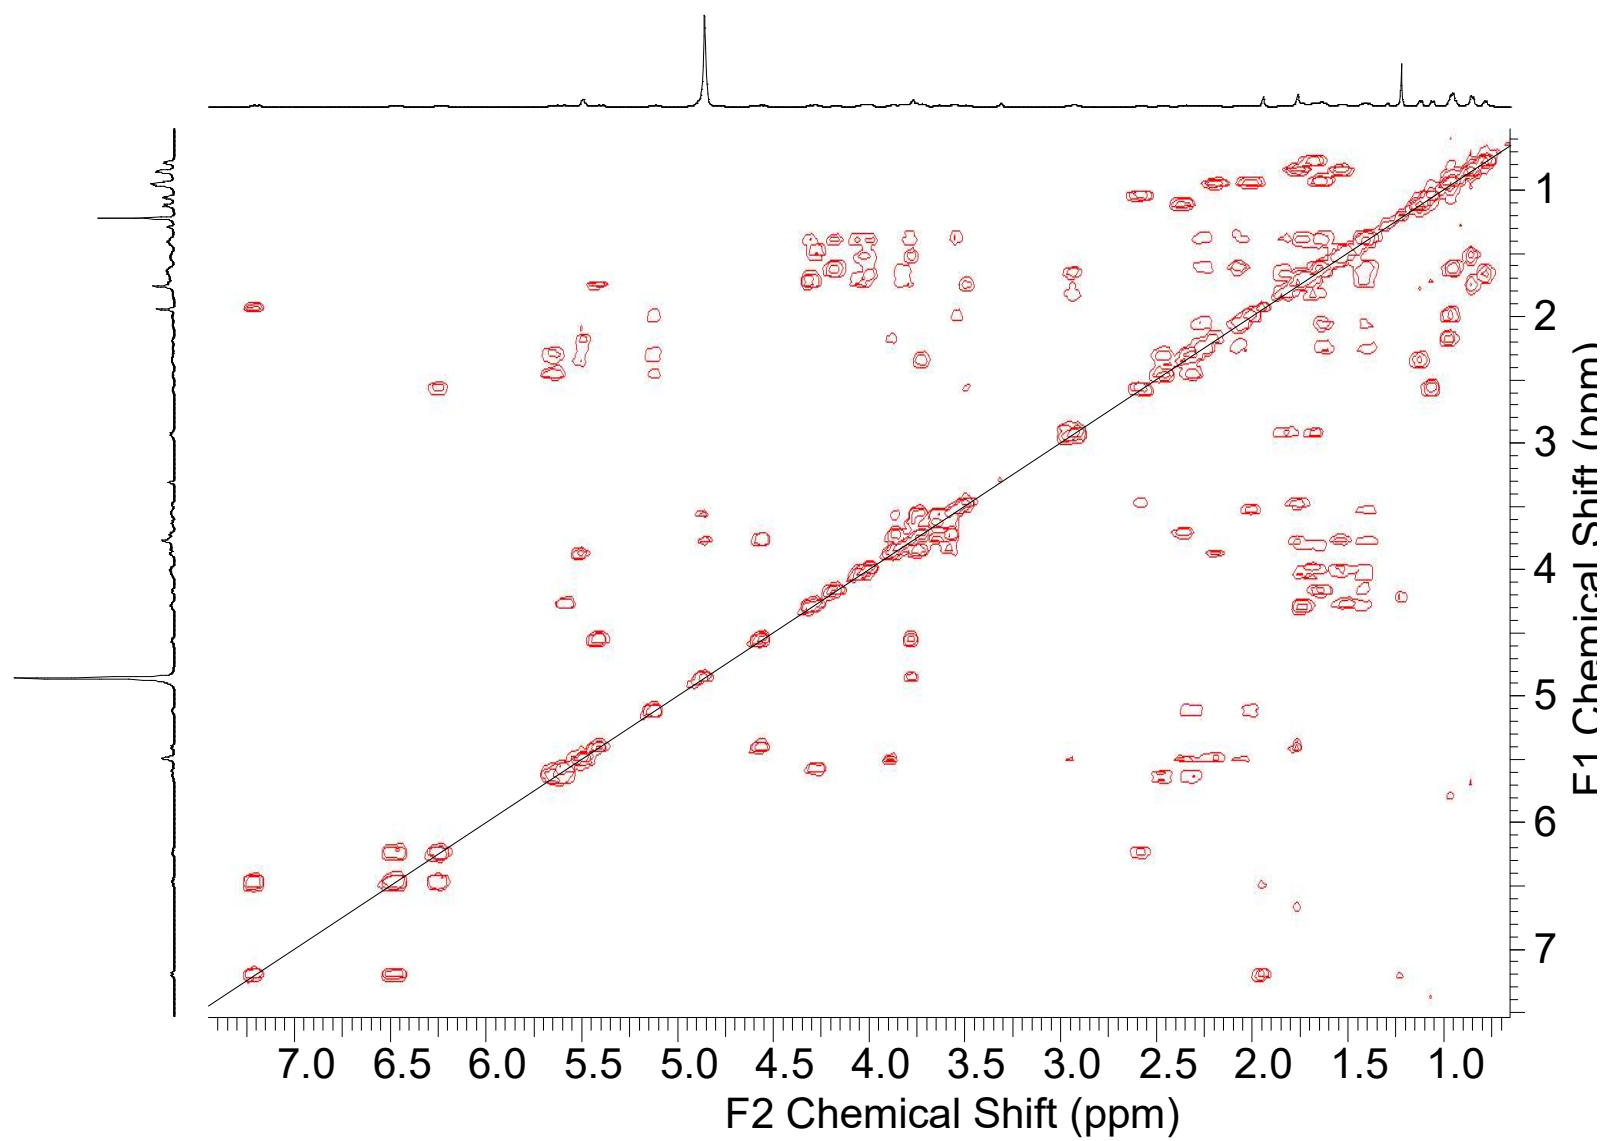

**Figure S5.** COSY spectrum of compound 1.

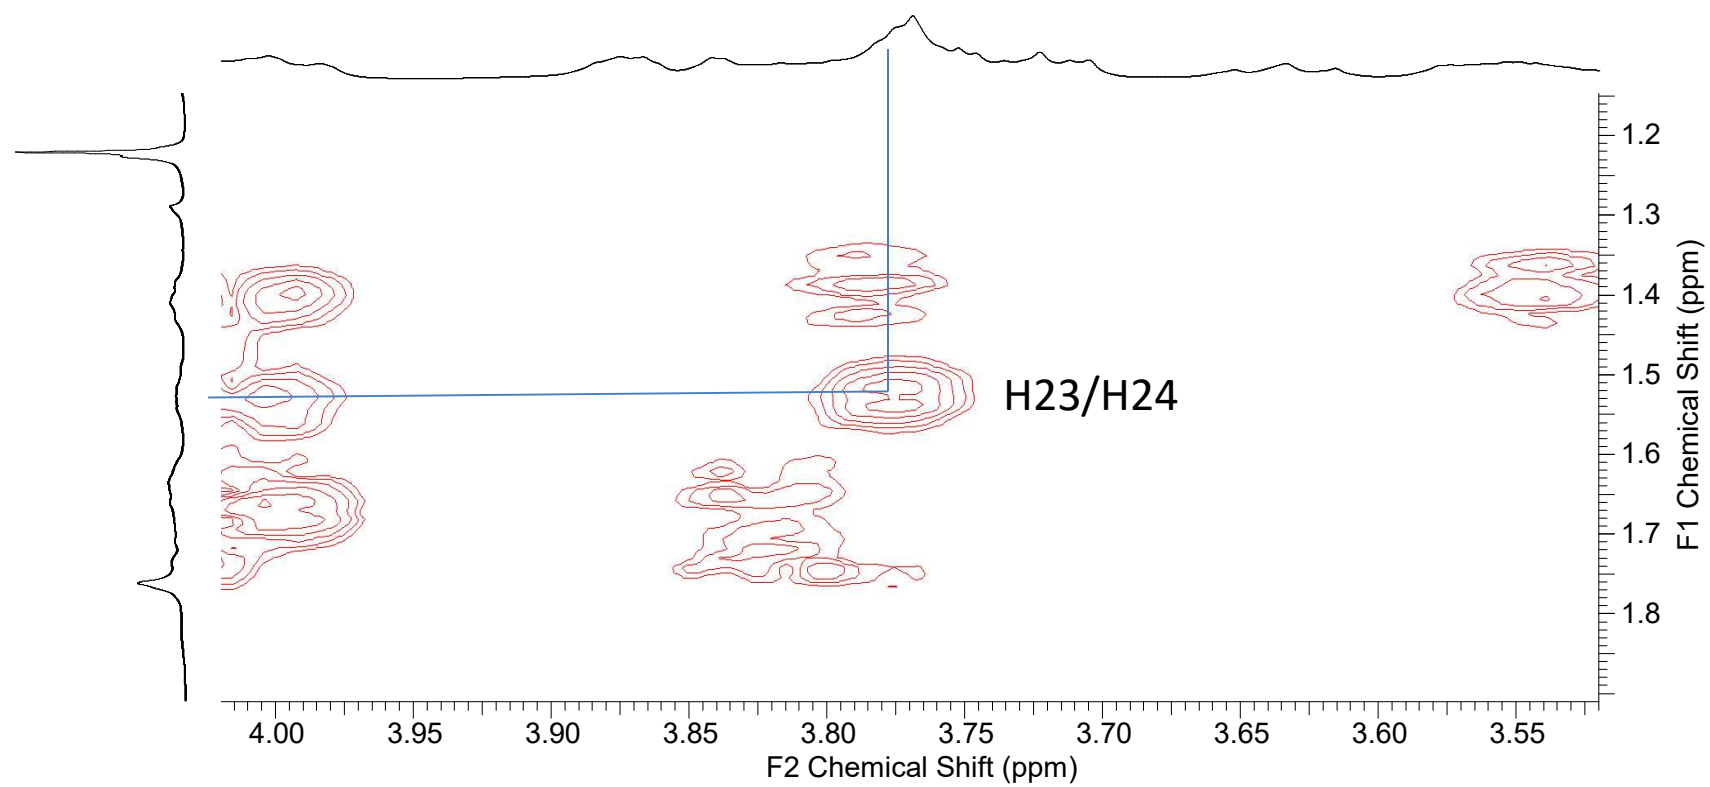

**Figure S6.** COSY spectrum of compound **1** (expansion).

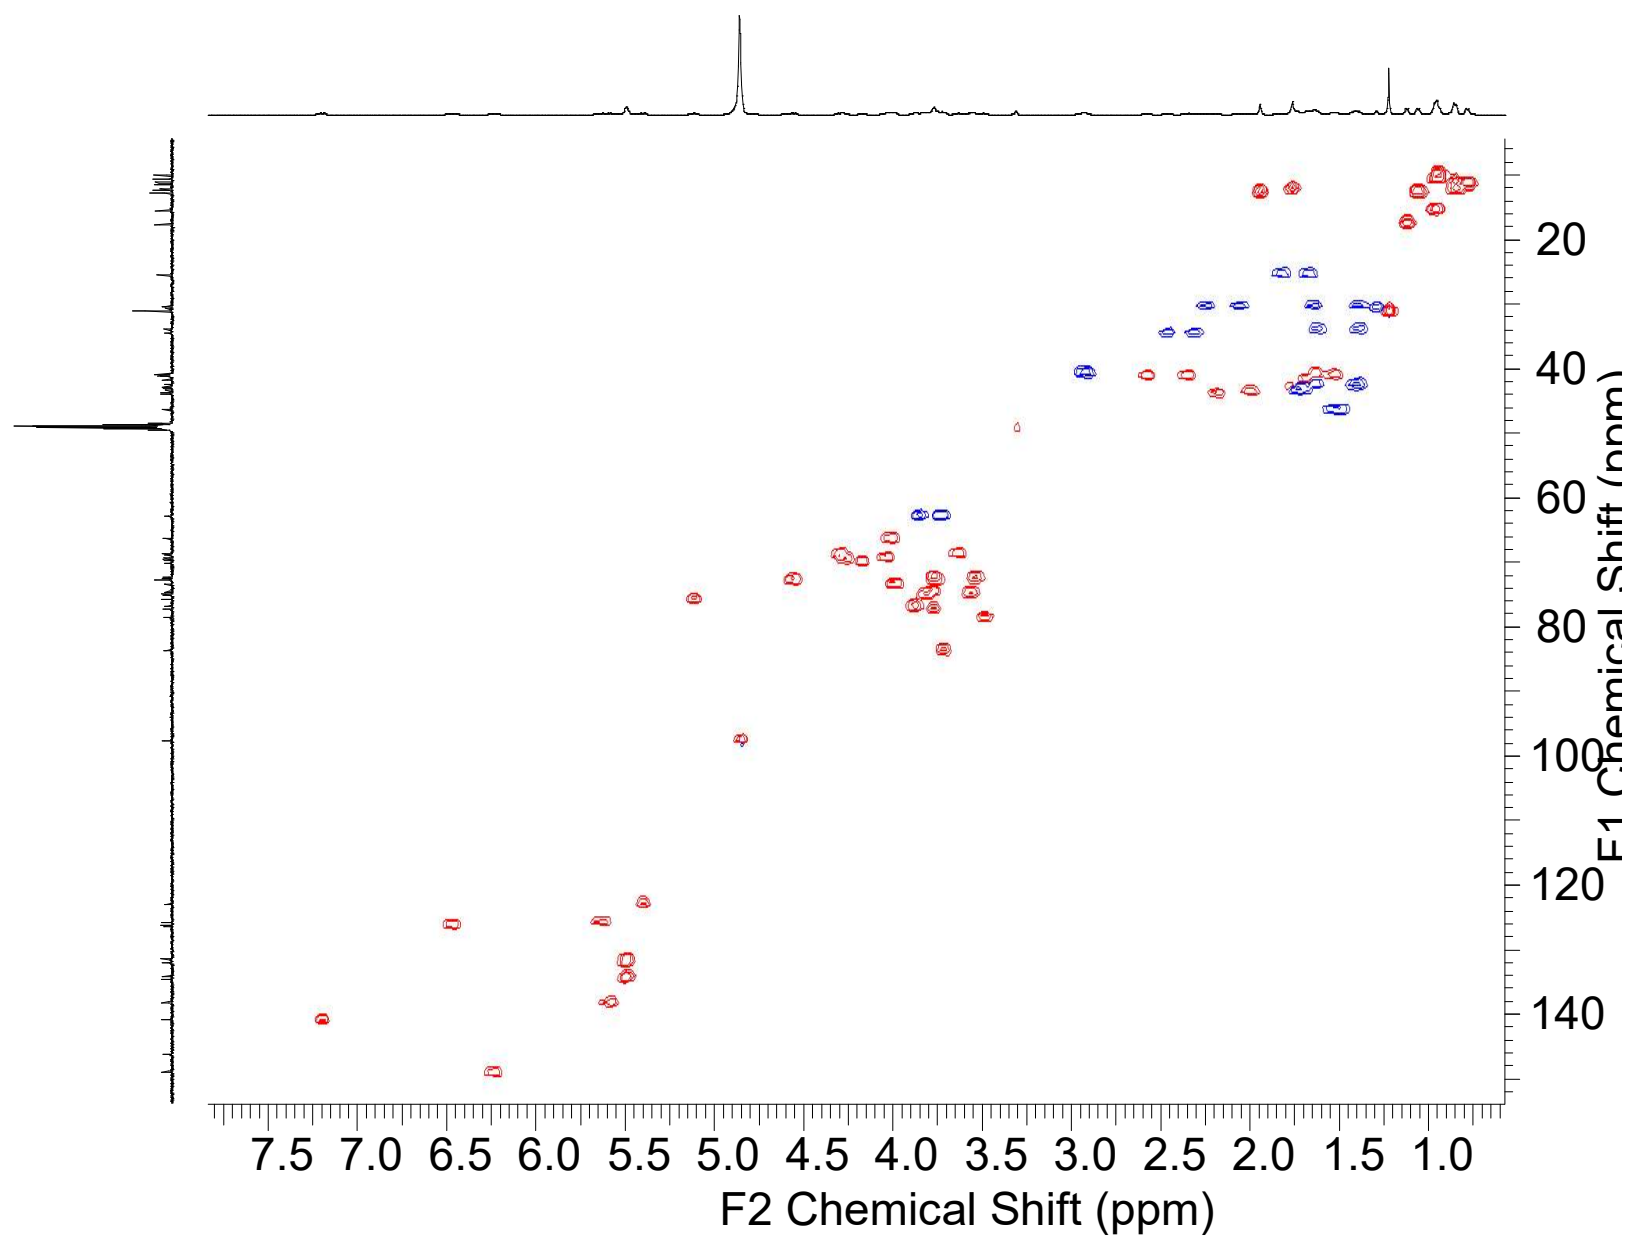

Figure S7. HSQC spectrum of compound 1.



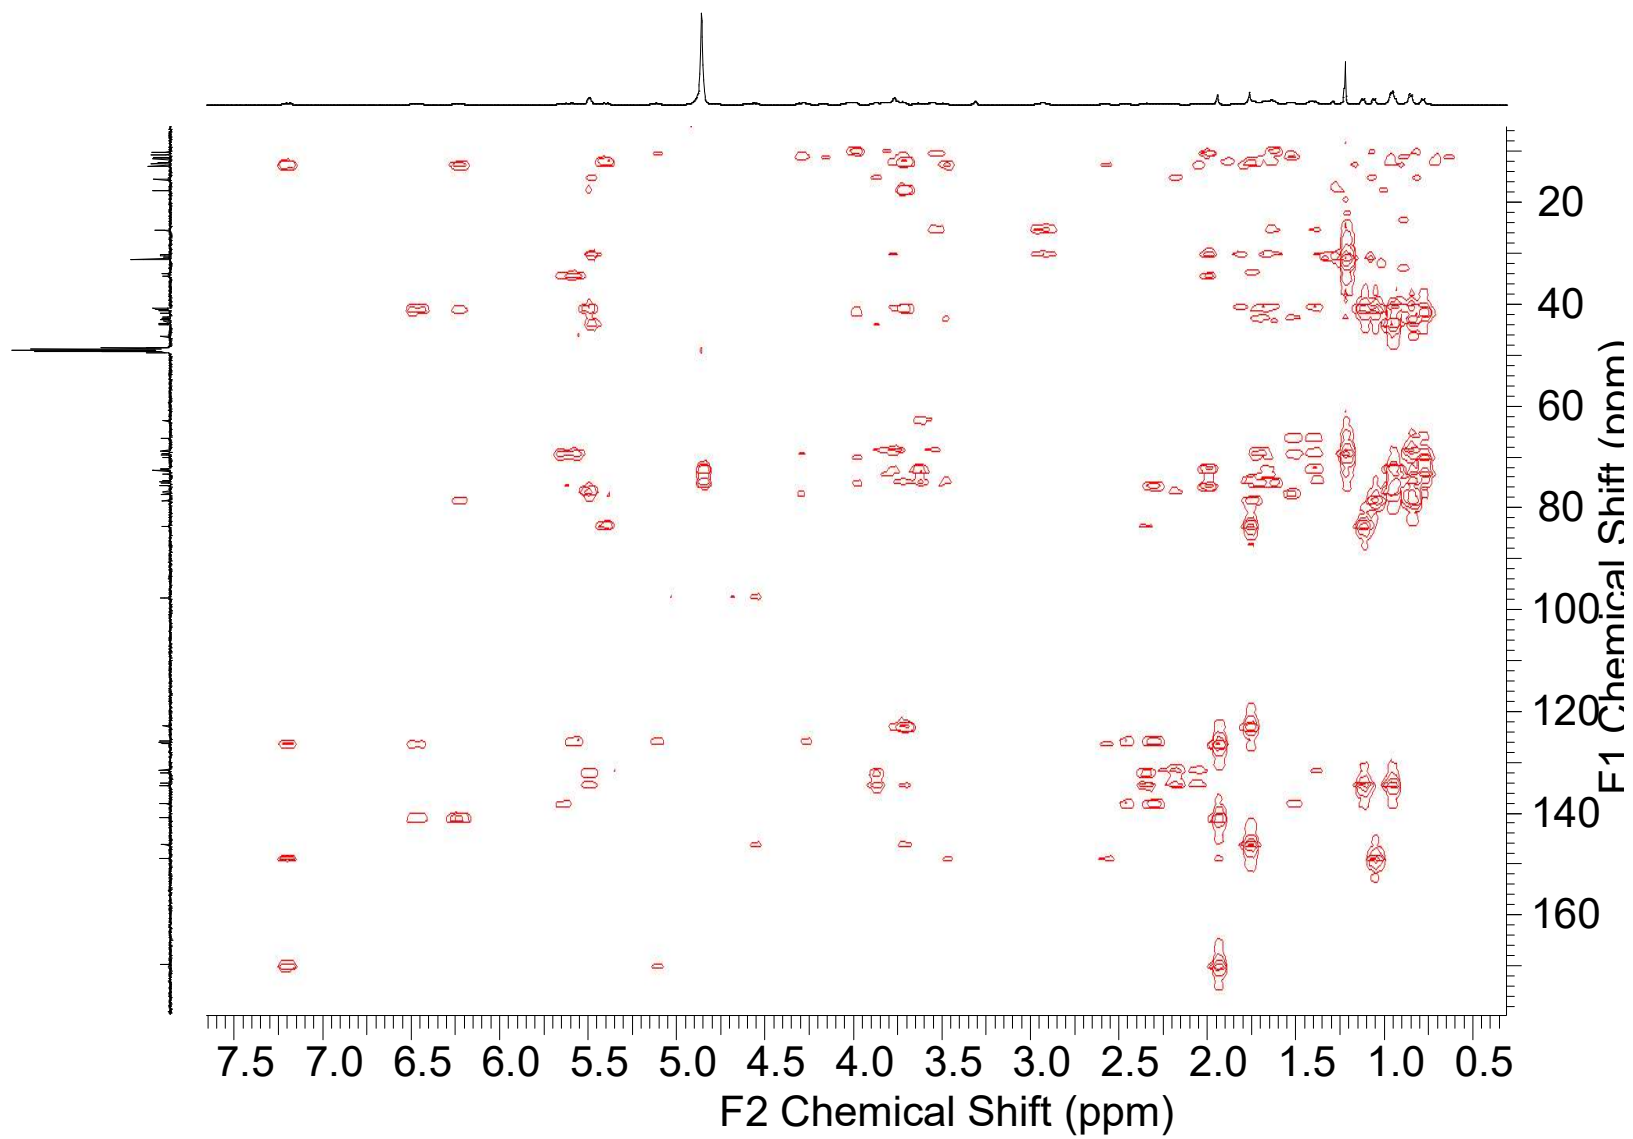

**Figure S8.** HMBC spectrum of compound 1.

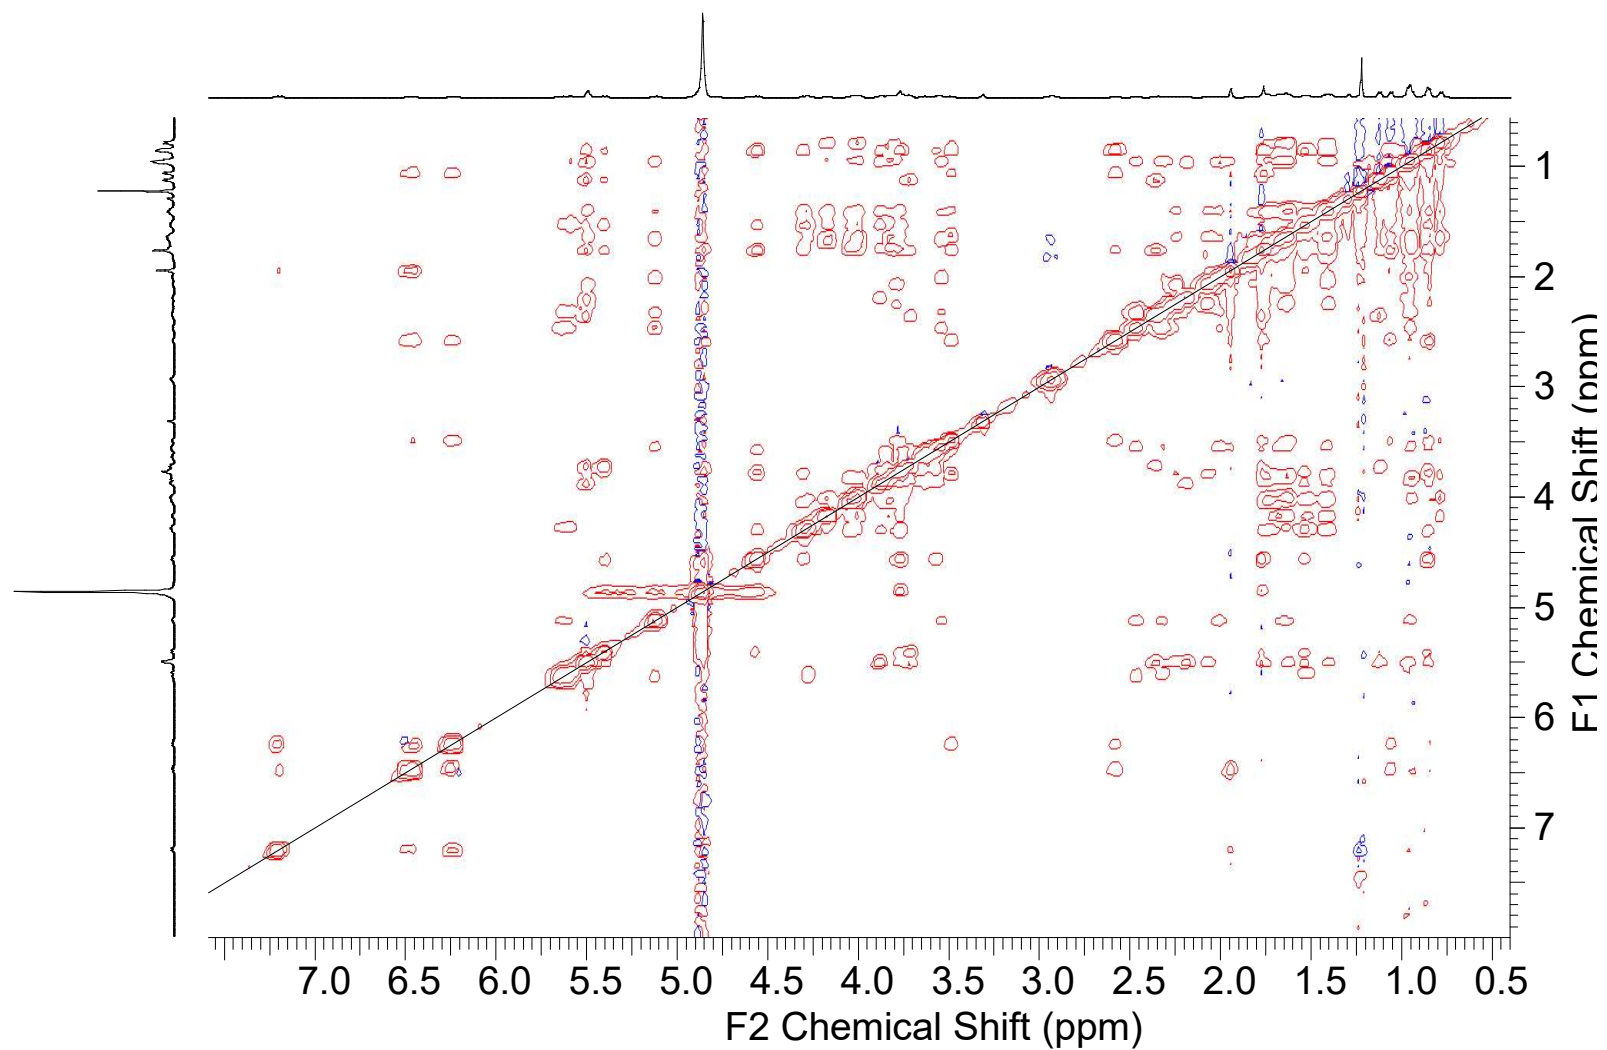

**Figure S9.** NOESY spectrum of compound 1.

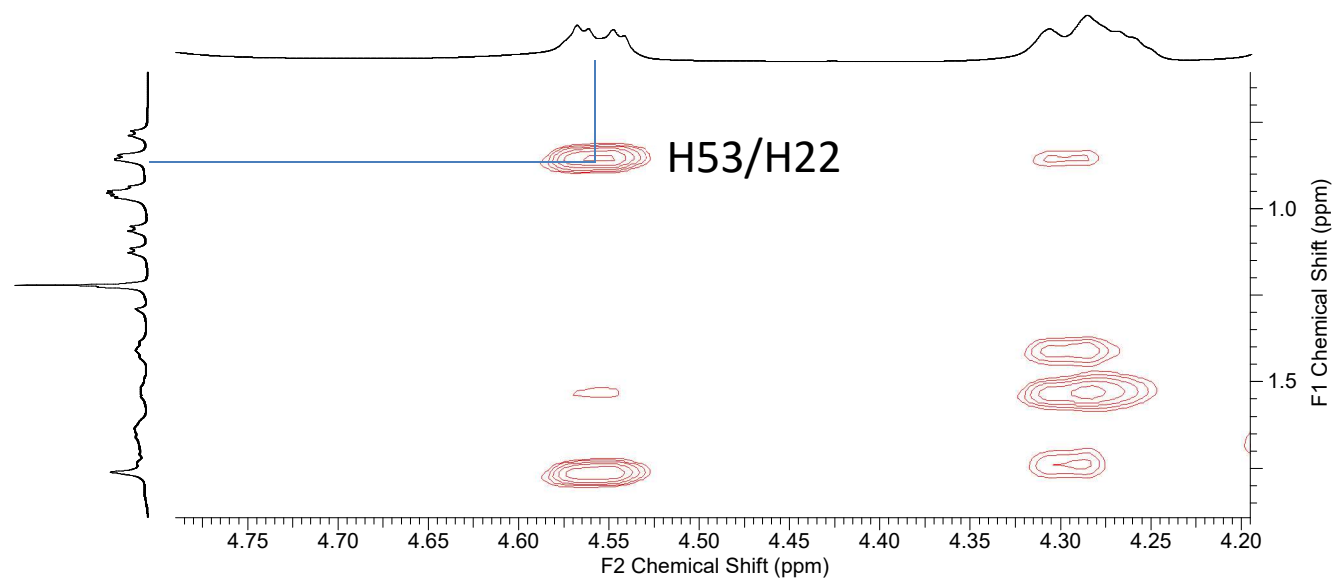

**Figure S10.** NOESY spectrum of compound **1** (expansion)
